# Supplementary material
Source: PubMed Central journal article supplement (PMC4501252)

## SUPPLEMENTAL MATERIAL

**SupplementalTable 1.** Baseline characteristics of WHS participants according to concordant or discordant LDL-C and non-HDL-C categories

|                                                                                 | LDL-C < median                  |                                 | LDL-C ≥ median                  |                                 |
|---------------------------------------------------------------------------------|---------------------------------|---------------------------------|---------------------------------|---------------------------------|
|                                                                                 | NHDL-C < median<br>(Concordant) | NHDL-C ≥ median<br>(Discordant) | NHDL-C < median<br>(Discordant) | NHDL-C ≥ median<br>(Concordant) |
|                                                                                 | N=12,026                        | N=1,569                         | N=1,616                         | N=12,322                        |
| Age, mean (SD), y                                                               | 53.5 (6.6)                      | 55.1 (7.0)                      | 54.2 (7.1)                      | 55.9 (7.3)                      |
| Current smoking, %                                                              | 9.4                             | 16.1                            | 8.8                             | 13.5                            |
| Hypertension, %                                                                 | 20.1                            | 34.9                            | 18.8                            | 29.6                            |
| Diabetes, %                                                                     | 1.9                             | 6.1                             | 1.2                             | 3.3                             |
| Postmenopausal, %                                                               | 58.2                            | 75.3                            | 59.4                            | 74.1                            |
| Hormone use, %                                                                  | 45.6                            | 56.2                            | 35.2                            | 41.2                            |
| Parental history of premature MI, %                                             | 11.5                            | 15.7                            | 12.6                            | 13.9                            |
| Body mass index, mean (SD), kg/m <sup>2</sup>                                   | 25.1 (4.8)                      | 27.8 (5.4)                      | 24.8 (4.4)                      | 26.6 (4.9)                      |
| Laboratory measurements, median (25 <sup>th</sup> -75 <sup>th</sup> percentile) |                                 |                                 |                                 |                                 |
| LDL-C, mg/dL                                                                    | 98 (86-109)                     | 113 (105-118)                   | 126 (123-130)                   | 148 (135-165)                   |
| NHDL-C, mg/dL                                                                   | 126 (111-138)                   | 164 (158-175)                   | 148 (144-151)                   | 184 (169-207)                   |
| HDL-C, mg/dL                                                                    | 54 (45-65)                      | 41 (35-51)                      | 57 (49-67)                      | 50 (42-60)                      |
| Triglycerides, mg/dL                                                            | 95 (70-134)                     | 249 (186-348)                   | 83 (67-103)                     | 146 (106-201)                   |
| ApoB, mg/dL                                                                     | 83 (72-92)                      | 112 (100-122)                   | 96 (91-104)                     | 122 (110-136)                   |
| LDL-P, nmol/L                                                                   | 977 (824-1148)                  | 1356 (1169-1552)                | 1144 (1026-1271)                | 1484 (1270-1735)                |
| LDL size, nm                                                                    | 21.2 (20.8-21.6)                | 20.4 (19.8-21.0)                | 21.4 (21.1-21.7)                | 21.1 (20.5-21.5)                |
| Cholesterol per LDL particle*                                                   | 2562 (2206-2947)                | 2098 (1799-2459)                | 2864 (2578-3208)                | 2614 (2279-3026)                |
| hsCRP, mg/L                                                                     | 1.65 (0.62-3.80)                | 3.72 (1.89-6.69)                | 1.05 (0.48-2.51)                | 2.34 (1.06-4.76)                |

Median values of LDL-C and NHDL-C were 121 mg/dL and 154 mg/dL

SD: standard deviation; Parental history: history of myocardial infarction in parent <60 years old; hsCRP: high-sensitivity C-reactive protein.

\*Estimate of the number of cholesterol molecules per LDL particle, calculated by dividing LDL-C (nmol/L) by LDL-P (nmol/L).

**Supplemental Table 2.** Baseline characteristics of WHS participants according to concordant or discordant LDL-C and apoB categories

|                                                                                 | LDL-C < median                |                               | LDL-C ≥ median                |                               |
|---------------------------------------------------------------------------------|-------------------------------|-------------------------------|-------------------------------|-------------------------------|
|                                                                                 | ApoB < median<br>(Concordant) | ApoB ≥ median<br>(Discordant) | ApoB < median<br>(Discordant) | ApoB ≥ median<br>(Concordant) |
|                                                                                 | N=11,033                      | N=2,562                       | N=2,634                       | N=11,304                      |
| Age, mean (SD), y                                                               | 53.3 (6.5)                    | 55.4 (7.1)                    | 54.1 (7.0)                    | 56.0 (7.3)                    |
| Current smoking, %                                                              | 9.5                           | 12.8                          | 8.9                           | 13.9                          |
| Hypertension, %                                                                 | 19.2                          | 32.8                          | 18.9                          | 30.6                          |
| Diabetes, %                                                                     | 1.8                           | 5.0                           | 1.1                           | 3.5                           |
| Postmenopausal, %                                                               | 56.7                          | 74.9                          | 60.9                          | 75.0                          |
| Hormone use, %                                                                  | 44.2                          | 58.0                          | 35.1                          | 41.7                          |
| Parental history of premature MI, %                                             | 11.5                          | 14.0                          | 11.9                          | 14.1                          |
| Body mass index, mean (SD), kg/m <sup>2</sup>                                   | 25.0 (4.7)                    | 27.5 (5.5)                    | 24.9 (4.2)                    | 26.7 (5.0)                    |
| Laboratory measurements, median (25 <sup>th</sup> -75 <sup>th</sup> percentile) |                               |                               |                               |                               |
| LDL-C, mg/dL                                                                    | 98 (85-108)                   | 111 (101-117)                 | 130 (125-139)                 | 148 (135-166)                 |
| NHDL-C, mg/dL                                                                   | 125 (110-137)                 | 152 (142-164)                 | 157 (148-169)                 | 185 (170-207)                 |
| HDL-C, mg/dL                                                                    | 55 (46-66)                    | 42 (35-52)                    | 60 (51-71)                    | 49 (42-58)                    |
| Triglycerides, mg/dL                                                            | 93 (68-131)                   | 182 (129-266)                 | 94 (73-125)                   | 149 (107-204)                 |
| ApoB, mg/dL                                                                     | 81 (71-89)                    | 112 (106-121)                 | 93 (88-97)                    | 124 (113-138)                 |
| LDL-P, nmol/L                                                                   | 955 (806-1109)                | 1359 (1182-1533)              | 1121 (993-1243)               | 1522 (1315-1761)              |
| LDL size, nm                                                                    | 21.3 (20.9-21.6)              | 20.7 (20.0-21.2)              | 21.4 (21.1-21.7)              | 21.1 (20.5-21.5)              |
| Cholesterol per LDL particle*                                                   | 2607 (2269-2986)              | 2067 (1769-2396)              | 3061 (2729-3541)              | 2559 (2243-2931)              |
| hsCRP, mg/L                                                                     | 1.56 (0.59-3.62)              | 3.40 (1.58-6.29)              | 1.24 (0.55-2.84)              | 2.41 (1.11-4.87)              |

Median values of LDL-C and apoB were 121 mg/dL and 100 mg/dL, respectively.

SD: standard deviation; Parental history: history of myocardial infarction in parent <60 years old; hsCRP: high-sensitivity C-reactive protein.

\*Estimate of the number of cholesterol molecules per LDL particle, calculated by dividing LDL-C (nmol/L) by LDL-P (nmol/L).

**Supplemental Table 3.** Baseline characteristics of WHS participants according to concordant or discordant LDL-C and LDL-P categories

|                                                                                 | LDL-C < median                 |                                | LDL-C ≥ median                 |                                |
|---------------------------------------------------------------------------------|--------------------------------|--------------------------------|--------------------------------|--------------------------------|
|                                                                                 | LDL-P < median<br>(Concordant) | LDL-P ≥ median<br>(Discordant) | LDL-P < median<br>(Discordant) | LDL-P ≥ median<br>(Concordant) |
|                                                                                 | N=10,341                       | N=3,254                        | N=3,430                        | N=10,508                       |
| Age, mean (SD), y                                                               | 53.3 (6.6)                     | 54.9 (7.0)                     | 54.6 (7.1)                     | 56.0 (7.3)                     |
| Current smoking, %                                                              | 9.5                            | 12.3                           | 10.3                           | 13.9                           |
| Hypertension, %                                                                 | 18.5                           | 32.3                           | 20.2                           | 31.0                           |
| Diabetes, %                                                                     | 1.7                            | 4.5                            | 1.1                            | 3.7                            |
| Postmenopausal, %                                                               | 56.9                           | 70.6                           | 63.6                           | 75.3                           |
| Hormone use, %                                                                  | 44.3                           | 54.7                           | 36.7                           | 41.7                           |
| Parental history of premature MI, %                                             | 11.3                           | 14.3                           | 12.7                           | 14.0                           |
| Body mass index, mean (SD), kg/m <sup>2</sup>                                   | 24.7 (4.6)                     | 27.7 (5.5)                     | 24.9 (4.4)                     | 26.9 (5.0)                     |
| Laboratory measurements, median (25 <sup>th</sup> -75 <sup>th</sup> percentile) |                                |                                |                                |                                |
| LDL-C, mg/dL                                                                    | 97 (84-108)                    | 109 (99-115)                   | 133 (126-145)                  | 149 (135-167)                  |
| NHDL-C, mg/dL                                                                   | 124 (109-137)                  | 147 (135-159)                  | 162 (152-176)                  | 187 (170-209)                  |
| HDL-C, mg/dL                                                                    | 56 (47-67)                     | 43 (36-52)                     | 61 (52-71)                     | 48 (41-57)                     |
| Triglycerides, mg/dL                                                            | 92 (67-129)                    | 163 (113-235)                  | 97 (74-129)                    | 152 (110-210)                  |
| ApoB, mg/dL                                                                     | 80 (70-89)                     | 104 (94-114)                   | 99 (91-109)                    | 125 (113-139)                  |
| LDL-P, nmol/L                                                                   | 931 (794-1057)                 | 1374 (1282-1511)               | 1093 (997-1158)                | 1555 (1379-1787)               |
| LDL size, nm                                                                    | 21.3 (21.0-21.6)               | 20.7 (20.1-21.1)               | 21.5 (21.2-21.8)               | 21.0 (20.4-21.4)               |
| Cholesterol per LDL particle*                                                   | 2688 (2396-3033)               | 1990 (1746-2189)               | 3276 (2989-3671)               | 2483 (2206-2764)               |
| hsCRP, mg/L                                                                     | 1.49 (0.57-3.51)               | 3.29 (1.51-6.10)               | 1.28 (0.57-2.90)               | 2.51 (1.17-4.97)               |

Median values of LDL-C and LDL-P were 121 mg/dL and 1216 nmol/L, respectively.

SD: standard deviation; Parental history: history of myocardial infarction in parent <60 years old; hsCRP: high-sensitivity C-reactive protein.

\*Estimate of the number of cholesterol molecules per LDL particle, calculated by dividing LDL-C (nmol/L) by LDL-P (nmol/L).

**Supplemental Table 4.** Underestimation or overestimation of coronary risk among women with LDL-C discordant with all three alternative LDL-related measures (NHDLC-C, apoB, and LDL-P)

|                                                                        | LDL-C < median                                  | LDL-C < median                                  | P value |
|------------------------------------------------------------------------|-------------------------------------------------|-------------------------------------------------|---------|
|                                                                        | NHDLC-C & ApoB & LDL-P < median<br>(Concordant) | NHDLC-C & ApoB & LDL-P ≥ median<br>(Discordant) |         |
| LDL-C, median (25 <sup>th</sup> -75 <sup>th</sup> percentile), mg/dL   | 96 (83-107)                                     | 114 (107-118)                                   |         |
| NHDLC-C, median (25 <sup>th</sup> -75 <sup>th</sup> percentile), mg/dL | 122 (107-133)                                   | 167 (160-178)                                   |         |
| ApoB, median (25 <sup>th</sup> -75 <sup>th</sup> percentile), mg/dL    | 79 (69-87)                                      | 117 (111-126)                                   |         |
| LDL-P, median (25 <sup>th</sup> -75 <sup>th</sup> percentile), nmol/L  | 915 (783-1042)                                  | 1508 (1376-1663)                                |         |
| No. events/N                                                           | 150/9,355                                       | 63/908                                          |         |
| Incidence rate, per 1000 p-y (95% CI)                                  | 0.99 (0.84-1.16)                                | 4.57 (3.57-5.85)                                |         |
| Age-adjusted HR (95% CI)                                               | 1.00                                            | 3.90 (2.90-5.25)                                | <0.001  |
| Minimally-adjusted HR (95% CI) *                                       | 1.00                                            | 2.91 (2.14-3.96)                                | <0.001  |
| Fully-adjusted HR (95% CI) †                                           | 1.00                                            | 1.69 (1.08-2.65)                                | 0.02    |
|                                                                        | LDL-C ≥ median                                  | LDL-C ≥ median                                  | P value |
|                                                                        | NHDLC-C & ApoB & LDL-P ≥ median<br>(Concordant) | NHDLC-C & ApoB & LDL-P < median<br>(Discordant) |         |
| LDL-C, median (25 <sup>th</sup> -75 <sup>th</sup> percentile), mg/dL   | 151 (138-169)                                   | 126 (123-129)                                   |         |
| NHDLC-C, median (25 <sup>th</sup> -75 <sup>th</sup> percentile), mg/dL | 190 (174-212)                                   | 147 (142-150)                                   |         |
| ApoB, median (25 <sup>th</sup> -75 <sup>th</sup> percentile), mg/dL    | 127 (117-141)                                   | 92 (87-95)                                      |         |
| LDL-P, median (25 <sup>th</sup> -75 <sup>th</sup> percentile), nmol/L  | 1587 (1409-1814)                                | 1056 (956-1131)                                 |         |
| No. events/N                                                           | 591/9435                                        | 8/856                                           |         |
| Incidence rate, per 1000 p-y (95% CI)                                  | 4.05 (3.73-4.39)                                | 0.58 (0.29-1.15)                                |         |
| Age-adjusted HR (95% CI)                                               | 1.00                                            | 0.16 (0.08-0.32)                                | <0.001  |
| Minimally-adjusted HR (95% CI) *                                       | 1.00                                            | 0.20 (0.10-0.39)                                | <0.001  |
| Fully-adjusted HR (95% CI) †                                           | 1.00                                            | 0.41 (0.20-0.84)                                | 0.02    |

\* Minimally-adjusted model included age, treatment assignment, hormone use, postmenopausal status, smoking, blood pressure

† Minimally-adjusted model variables plus diabetes, body mass index, HDL cholesterol, triglycerides, high-sensitivity C-reactive protein, parental history of premature myocardial infarction

Median values of LDL-C, NHDL-C, apoB, and LDL-P were 121 mg/dL, 154 mg/dL, 100 mg/dL, and 1216 nmol/L, respectively.

## Supplemental Figure Legends

**Supplemental Figure 1.** Cumulative probability of incident CHD events by concordant and discordant LDL-C among women with <median NHDL-C, apoB, or LDL-P. Median values of LDL-C, NHDL-C, apoB, and LDL-P were 121 mg/dL, 154 mg/dL, 100 mg/dL, and 1216 nmol/L, respectively. Hazard ratios and 95% confidence intervals obtained from Cox regression models. P for trend obtained from log-rank test.

**Supplemental Figure 2.** Cumulative probability of incident CHD events by concordant and discordant LDL-C among women with  $\geq$  median NHDL-C, apoB, or LDL-P. Median values of LDL-C, NHDL-C, apoB, and LDL-P were 121 mg/dL, 154 mg/dL, 100 mg/dL, and 1216 nmol/L, respectively. Hazard ratios and 95% confidence intervals obtained from Cox regression models. P for trend obtained from log-rank test.

Supplemental Figure 1.

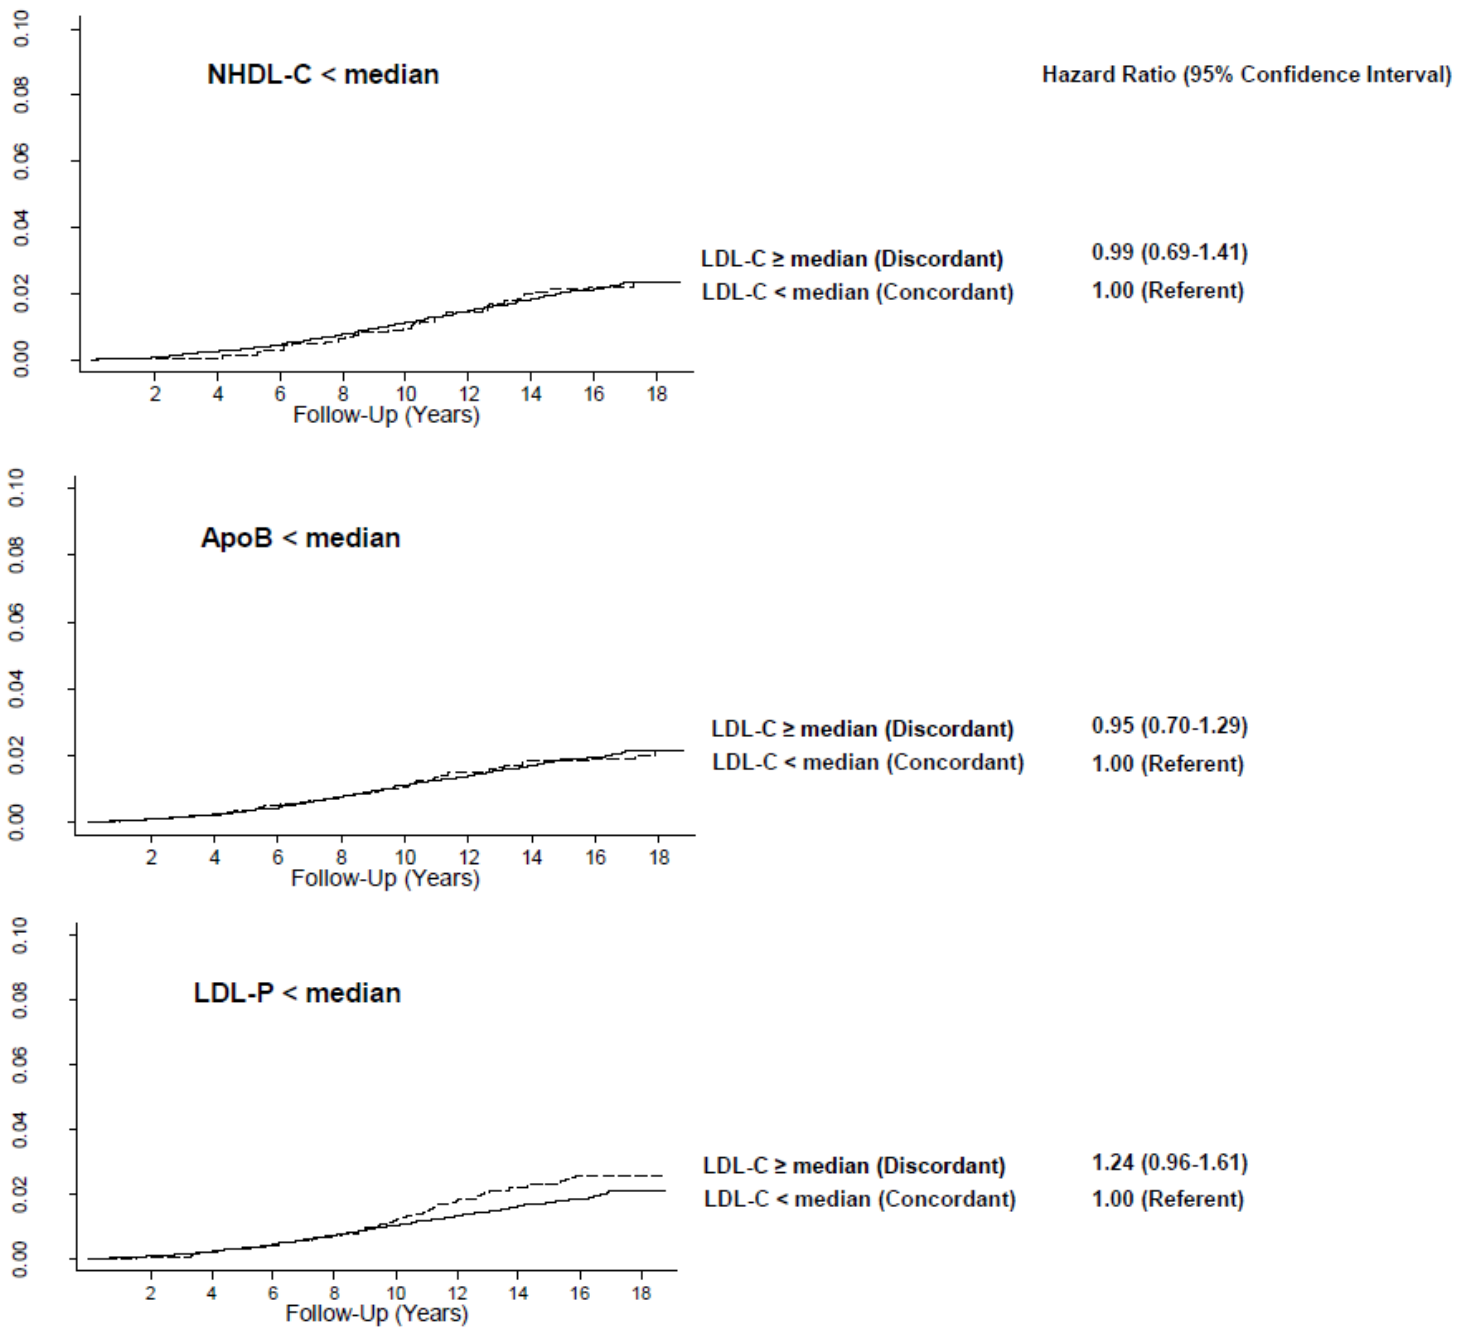



Supplemental Figure 2.

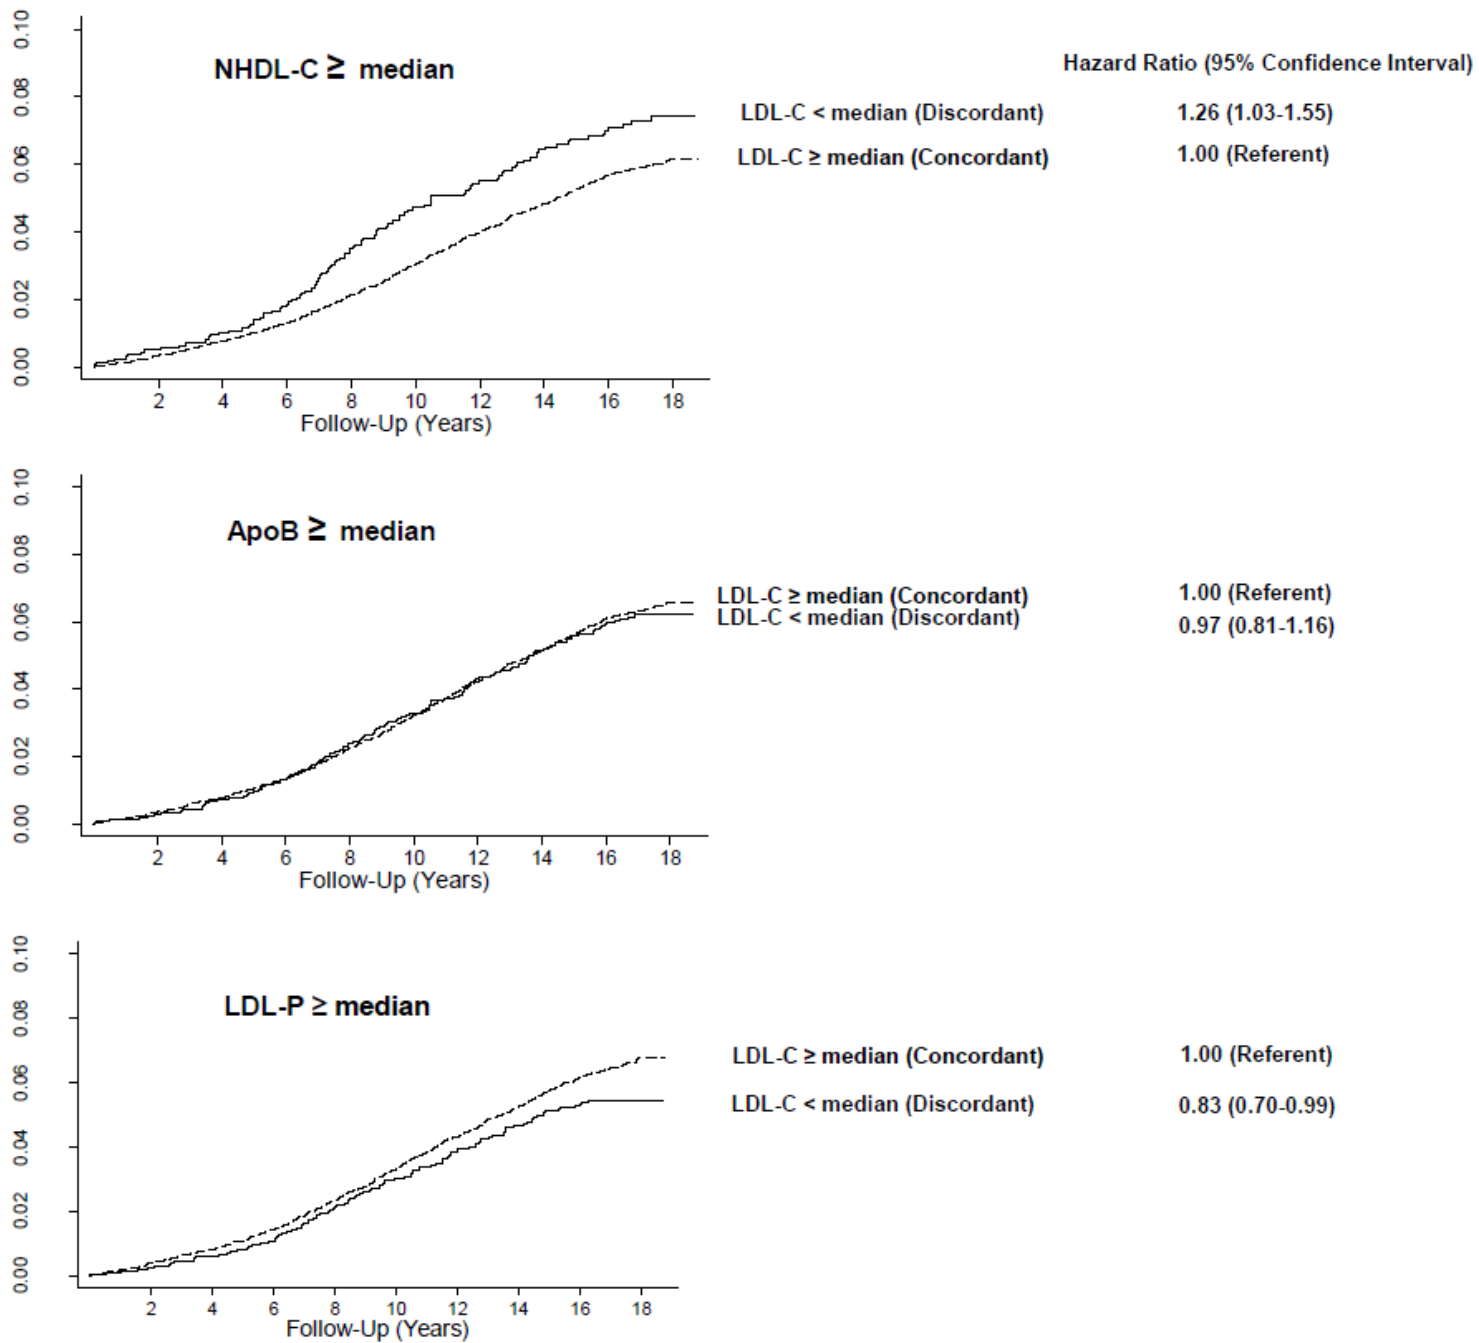

Supplement: NIHMS543010-supplement-supplemental_material.pdf [file NIHMS543010-supplement-supplemental_material.pdf]
